# Supplementary material for: Hydrological threats to riparian wetlands of international importance – a global quantitative and qualitative analysis
Source: Copernicus journal article supplement (doi:10.5194/hess-21-2799-2017), 2017-06-09
Supplement: Supplementary file 1 [file hess-21-2799-2017-supplement.pdf]

Supplement of Hydrol. Earth Syst. Sci., 21, 2799–2815, 2017  
<https://doi.org/10.5194/hess-21-2799-2017-supplement>  
© Author(s) 2017. This work is distributed under  
the Creative Commons Attribution 3.0 License.

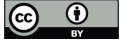

*Supplement of*

## **Hydrological threats to riparian wetlands of international importance – a global quantitative and qualitative analysis**

**Christof Schneider et al.**

*Correspondence to:* Christof Schneider (schneider@usf.uni-kassel.de)

The copyright of individual parts of the supplement might differ from the CC BY 3.0 License.

This supplementary material contains the following information:

S1 – A detailed list of all wetlands analyzed in the study

S2 – Detailed results for each analyzed wetland

S3 – Changes in overbank flows under each of the five applied GCM projections

## Supplementary material (S1)

In the paper, we exemplify the proposed screening tool for a selected sample of riparian wetlands. We selected the wetlands based on two criteria: (i) international importance of the wetland (i.e. listed under the Ramsar Convention) and (ii) main source of hydrological recharge is lateral overspill of adjacent rivers (i.e. fluvio-genic wetlands). Altogether, 93 sites were selected ranging from 5 to 55374 km<sup>2</sup> in size. They are located in 48 different countries and 47 different river basins. A detailed list of all analyzed wetlands is provided in Table S1.

**Table S1.** Detailed list of riparian wetlands considered in the study

| ID | Wetland name                           | Country        | Ramsar Ref | Area [ha] |
|----|----------------------------------------|----------------|------------|-----------|
| 1  | Peace-Athabasca Delta                  | Canada         | 4CA007     | 321,300   |
| 2  | Lac Saint Pierre                       | Canada         | 4CA036     | 11,952    |
| 3  | The Emiquon Complex                    | USA            | 4US033     | 5,729     |
| 4  | Cache-Lower White Rivers               | USA            | 4US008     | 99,166    |
| 5  | La Segua                               | Ecuador        | 6EC005     | 1,836     |
| 6  | Mamiraua                               | Brazil         | 6BR003     | 1,124,000 |
| 7  | Ilha do Bananal                        | Brazil         | 6BR004     | 562,312   |
| 8  | Rio Yata                               | Bolivia        | 6BO011     | 2,813,229 |
| 9  | Rio Blanco                             | Bolivia        | 6BO009     | 2,404,916 |
| 10 | Rio Matos                              | Bolivia        | 6BO010     | 1,729,788 |
| 11 | Pantanal Matogrossense                 | Brazil         | 6BR001     | 135,000   |
| 12 | Humedales Chaco                        | Argentina      | 6AR013     | 508,000   |
| 13 | Jaaukanigas                            | Argentina      | 6AR009     | 492,000   |
| 14 | River Luiro Mires                      | Finland        | 3FI039     | 12,345    |
| 15 | Matsalu Nature Reserve                 | Estonia        | 3EE001     | 48,610    |
| 16 | River Spey - Insh Marshes              | United Kingdom | 3UK106     | 1,159     |
| 17 | Firth of Tay and Eden Estuary          | United Kingdom | 3UK144     | 6,918     |
| 18 | Helgean                                | Sweden         | 3SE003     | 8,050     |
| 19 | Lower Derwent Valley                   | United Kingdom | 3UK023     | 915       |
| 20 | Elbauen, Schnackenburg-Lauenburg       | Germany        | 3DE005     | 7,560     |
| 21 | Unteres Odertal, Schwedt               | Germany        | 3DE022     | 5,400     |
| 22 | Niederung der unteren Havel            | Germany        | 3DE021     | 8,920     |
| 23 | Nene Washes                            | United Kingdom | 3UK059     | 1,517     |
| 24 | Desna River Floodplains                | Ukraine        | 3UA028     | 4,270     |
| 25 | Mid-Pripyat State Landscape Zakaznik   | Belarus        | 3BY002     | 90,447    |
| 26 | Prypiat River Floodplains              | Ukraine        | 3UA021     | 12,000    |
| 27 | Unterer Niederrhein                    | Germany        | 3DE028     | 25,000    |
| 28 | Stokhid River Floodplains              | Ukraine        | 3UA022     | 10,000    |
| 29 | Rheinauen zwischen Eltville und Bingen | Germany        | 3DE009     | 566       |
| 30 | Litovelske Pomoravi                    | Czech Republic | 3CZ008     | 5,122     |
| 31 | Donauauen & Donaumoos                  | Germany        | 3DE011     | 8,000     |
| 32 | Felső-Tisza (Upper Tisza)              | Hungary        | 3HU023     | 22,311    |
| 33 | Moravske luhy (Morava floodplains)     | Slovakia       | 3SK005     | 5,380     |
| 34 | Tisa River                             | Slovakia       | 3SK014     | 735       |
| 35 | Donau-March-Thaya-Auen                 | Austria        | 3AT002     | 36,090    |
| 36 | Ipoly Valley                           | Hungary        | 3HU021     | 2,227     |
| 37 | Dunajske luhy (Danube floodplains)     | Slovakia       | 3SK006     | 14,488    |
| 38 | Grande Briere                          | France         | 3FR013     | 19,000    |
| 39 | Raba valley (Raba-völgy)               | Hungary        | 3HU025     | 10,961    |
| 40 | Upper Drava River                      | Austria        | 3AT023     | 1,029     |

| ID | Wetland name                                             | Country      | Ramsar Ref | Area [ha] |
|----|----------------------------------------------------------|--------------|------------|-----------|
| 41 | Dnipro River Delta                                       | Ukraine      | 3UA009     | 26,000    |
| 42 | Lower Dniester (Nistru de Jos)                           | Moldova      | 3MD002     | 60,000    |
| 43 | Dniester-Turunchuk Crossrivers Area                      | Ukraine      | 3UA006     | 76,000    |
| 44 | Gemenc                                                   | Hungary      | 3HU015     | 16,873    |
| 45 | Mures Floodplain                                         | Romania      | 3RO004     | 17,166    |
| 46 | Nature Park Kopacki rit                                  | Croatia      | 3HR002     | 23,894    |
| 47 | Lonjsko polje and Mokro polje                            | Croatia      | 3HR003     | 51,218    |
| 48 | Danube Delta                                             | Romania      | 3RO001     | 647,000   |
| 49 | Obedska Bara                                             | Serbia       | 3RS001     | 17,501    |
| 50 | Canaralele de la Horsova                                 | Romania      | 3RO016     | 7,406     |
| 51 | Danube Islands-Bugeac-Iortmac                            | Romania      | 3RO017     | 82,832    |
| 52 | Belene Islands Complex                                   | Bulgaria     | 3BG006     | 18,330    |
| 53 | Camargue                                                 | France       | 3FR001     | 85,000    |
| 54 | Neretva River Delta                                      | Croatia      | 3HR004     | 12,742    |
| 55 | Paul de Boquilobo                                        | Portugal     | 3PT005     | 529       |
| 56 | Donana                                                   | Spain        | 3ES001     | 111,646   |
| 57 | Sebkhet Kelbia                                           | Tunisia      | 1TN016     | 8,732     |
| 58 | Embouchure de la Moulouya                                | Morocco      | 1MA015     | 3,000     |
| 59 | Delta Interieur du Niger                                 | Mali         | 1ML001     | 4,119,500 |
| 60 | Lake Chad Wetlands in Nigeria                            | Nigeria      | 1NG002     | 607,354   |
| 61 | Baturiyya Wetland                                        | Nigeria      | 1NG004     | 101,095   |
| 62 | Zone humide du moyen Niger II                            | Niger        | 1NE007     | 65,850    |
| 63 | Plaines d'inondation des Bahr Aouk et Salamat            | Chad         | 1TD005     | 4,922,000 |
| 64 | Lower Kaduna-Middle Niger Floodplain                     | Nigeria      | 1NG007     | 229,054   |
| 65 | Tana River Delta                                         | Kenya        | 1KE006     | 163,600   |
| 66 | Kilombero Valley Floodplain                              | Tanzania     | 1TZ003     | 796,735   |
| 67 | Luangwa Flood Plains                                     | Zambia       | 1ZM005     | 250,000   |
| 68 | Zambezi Floodplains                                      | Zambia       | 1ZM007     | 900,000   |
| 69 | Marromeu Complex (Zambezi Delta)                         | Mozambique   | 1MZ001     | 688,000   |
| 70 | Okavango Delta System                                    | Botswana     | 1BW001     | 5,537,400 |
| 71 | Ndumo Game Reserve                                       | South Africa | 1ZA014     | 10,117    |
| 72 | Lower Dvuoobje                                           | Russia       | 2RU013     | 540,000   |
| 73 | Oka & Pra River Floodplains                              | Russia       | 3RU007     | 161,542   |
| 74 | Volga Delta                                              | Russia       | 3RU002     | 800,000   |
| 75 | Shandong Yellow River Delta Wetland                      | China        | 2CN045     | 95,950    |
| 76 | Lower part of Pyandj River                               | Tajikistan   | 2TJ003     | -         |
| 77 | Hawizeh Marsh (Haur Al-Hawizeh)                          | Iraq         | 2IQ001     | 137,700   |
| 78 | Shadegan Marshes & mudflats of Khor-al Amaya & Khor Musa | Iran         | 2IR006     | 400,000   |
| 79 | Dong dongting hu                                         | China        | 2CN004     | 190,000   |
| 80 | Sundarbans Reserved Forest                               | Bangladesh   | 2BD001     | 601,700   |
| 81 | Middle Stretches of the Mekong River                     | Cambodia     | 2KH003     | 14,600    |
| 82 | Boeng Chhmar                                             | Cambodia     | 2KH001     | 28,000    |
| 83 | Bau Sau Wetlands and Seasonal Floodplains                | Viet Nam     | 2VN002     | 13,759    |
| 84 | Tram Chim National Park                                  | Viet Nam     | 2VN004     | 7,313     |
| 85 | Lower Kinabatangan-Segama Wetland                        | Malaysia     | 2MY006     | 78,803    |
| 86 | Danau Sentarum                                           | Indonesia    | 2ID002     | 80,000    |
| 87 | Kakadu National Park                                     | Australia    | 5AU002     | 1,979,766 |
| 88 | Ord River floodplain                                     | Australia    | 5AU031     | 141,453   |
| 89 | Gwydir Wetlands                                          | Australia    | 5AU051     | 823       |
| 90 | Macquarie Marshes                                        | Australia    | 5AU027     | 19,850    |
| 91 | Riverland                                                | Australia    | 5AU029     | 30,640    |
| 92 | Banrock Station Wetland Complex                          | Australia    | 5AU059     | 1,375     |
| 93 | Barmah Forest                                            | Australia    | 5AU014     | 28,515    |

## Supplementary material (S2)

We assessed hydrological threats by five different indicators in the paper. The quantitative part of the assessment is based on the flood pulse concept (Junk et al., 1989, Tockner et al., 2000) and considers the reduction in flood volume (i.e. all daily flows above bankfull) due to (i) current water management and (ii) climate change in the 2050s. In the qualitative assessment, we evaluated the potential for future flow modifications by the number of new dam initiatives taking currently part in the upstream area of each wetland. Further qualitative results address for each site the capacity to act by evaluating whether upstream water resource availability and the existing institutional framework could support the implementation of conservation measures. Table S2 provides the detailed results of the multi-indicator assessment described in Chapter 3 of the paper.

**Table S2.** Detailed results of the multi-indicator assessment for the 93 selected riparian wetlands. Numbers provided in brackets represent the number of month with water scarcity upstream (column 7). In column 8, transboundary and non-transboundary upstream areas need to be distinguished. For wetlands with a transboundary upstream area, a score ranging from zero to six was calculated to describe formal institutional capacity. For wetlands with a non-transboundary upstream area, only presence (=yes) or absence (=no) of legal provisions or official recommendation to establish eFlows are considered.

| ID | Wetland name                     | Ramsar Reference | Flood volume reduction water management | Flood volume reduction climate change 2050s | Potential impact by new dam initiatives | Water availability for ecol. allocations | Formal institutional capacity |
|----|----------------------------------|------------------|-----------------------------------------|---------------------------------------------|-----------------------------------------|------------------------------------------|-------------------------------|
| 1  | Peace-Athabasca Delta            | 4CA007           | seriously                               | increase (low)                              | none                                    | high (0)                                 | no                            |
| 2  | Lac Saint-Pierre                 | 4CA036           | significantly                           | increase (low)                              | none                                    | high (0)                                 | high                          |
| 3  | The Emiquon Complex              | 4US033           | slightly                                | increase (low)                              | none                                    | med (2)                                  | yes                           |
| 4  | Cache-Lower White Rivers         | 4US008           | seriously                               | increase (low)                              | none                                    | med (4)                                  | no                            |
| 5  | La Segua                         | 6EC005           | seriously                               | increase (high)                             | none                                    | med (4)                                  | yes                           |
| 6  | Mamiraua                         | 6BR003           | slightly                                | increase (low)                              | high                                    | high (0)                                 | med                           |
| 7  | Ilha do Bananal                  | 6BR004           | slightly                                | slightly                                    | med                                     | high (0)                                 | yes                           |
| 8  | Rio Yata                         | 6BO011           | slightly                                | seriously                                   | none                                    | high (0)                                 | no                            |
| 9  | Rio Blanco                       | 6BO009           | slightly                                | seriously                                   | none                                    | high (0)                                 | no                            |
| 10 | Rio Matos                        | 6BO010           | slightly                                | slightly                                    | med                                     | high (0)                                 | no                            |
| 11 | Pantanal Matogrossense           | 6BR001           | slightly                                | moderately                                  | med                                     | high (0)                                 | yes                           |
| 12 | Humedales Chaco                  | 6AR013           | seriously                               | slightly                                    | high                                    | high (0)                                 | med                           |
| 13 | Jaaukanigas                      | 6AR009           | seriously                               | slightly                                    | high                                    | high (0)                                 | med                           |
| 14 | River Luiro Mires                | 3FI039           | seriously                               | slightly                                    | none                                    | high (0)                                 | no                            |
| 15 | Matsalu Nature Reserve           | 3EE001           | slightly                                | moderately                                  | none                                    | high (0)                                 | yes                           |
| 16 | River Spey - Insh Marshes        | 3UK106           | slightly                                | increase (high)                             | none                                    | high (0)                                 | yes                           |
| 17 | Firth of Tay and Eden Estuary    | 3UK144           | slightly                                | increase (high)                             | none                                    | high (0)                                 | yes                           |
| 18 | Helgean                          | 3SE003           | slightly                                | increase (high)                             | none                                    | high (1)                                 | no                            |
| 19 | Lower Derwent Valley             | 3UK023           | slightly                                | moderately                                  | none                                    | high (1)                                 | yes                           |
| 20 | Elbauen, Schnackenburg-Lauenburg | 3DE005           | significantly                           | moderately                                  | none                                    | high (0)                                 | high                          |
| 21 | Unteres Odertal, Schwedt         | 3DE022           | slightly                                | slightly                                    | none                                    | high (0)                                 | high                          |

| ID | Wetland name                           | Ramsar Reference | Flood volume reduction water management | Flood volume reduction climate change 2050s | Potential impact by new dam initiatives | Water availability for ecol. allocations | Formal institutional capacity |
|----|----------------------------------------|------------------|-----------------------------------------|---------------------------------------------|-----------------------------------------|------------------------------------------|-------------------------------|
| 22 | Niederung der unteren Havel            | 3DE021           | slightly                                | increase (low)                              | none                                    | high (0)                                 | yes                           |
| 23 | Nene Washes                            | 3UK059           | slightly                                | moderately                                  | none                                    | med (4)                                  | yes                           |
| 24 | Desna River Floodplains                | 3UA028           | slightly                                | significantly                               | none                                    | high (0)                                 | low                           |
| 25 | Mid-Prpyat State Landscape Zakaznik    | 3BY002           | slightly                                | slightly                                    | none                                    | high (0)                                 | low                           |
| 26 | Prypiat River Floodplains              | 3UA021           | slightly                                | significantly                               | none                                    | high (0)                                 | no                            |
| 27 | Unterer Niederrhein                    | 3DE028           | slightly                                | increase (low)                              | none                                    | high (0)                                 | high                          |
| 28 | Stokhid River Floodplains              | 3UA022           | slightly                                | moderately                                  | none                                    | high (0)                                 | no                            |
| 29 | Rheinauen zwischen Eltville und Bingen | 3DE009           | slightly                                | seriously                                   | none                                    | high (0)                                 | high                          |
| 30 | Litovelske Pomoravi                    | 3CZ008           | slightly                                | slightly                                    | none                                    | high (0)                                 | yes                           |
| 31 | Donauauen & Donaumoos                  | 3DE011           | slightly                                | moderately                                  | none                                    | high (0)                                 | yes                           |
| 32 | Felső-Tisza (Upper Tisza)              | 3HU023           | slightly                                | seriously                                   | none                                    | high (0)                                 | high                          |
| 33 | Moravske luhy (Morava floodplains)     | 3SK005           | seriously                               | moderately                                  | none                                    | med (3)                                  | high                          |
| 34 | Tisa River                             | 3SK014           | slightly                                | seriously                                   | none                                    | high (0)                                 | high                          |
| 35 | Donau-March-Thaya-Auen                 | 3AT002           | significantly                           | increase (high)                             | none                                    | high (0)                                 | high                          |
| 36 | Ipoly Valley                           | 3HU021           | slightly                                | seriously                                   | none                                    | med (4)                                  | high                          |
| 37 | Dunajske luhy (Danube floodplains)     | 3SK006           | significantly                           | increase (high)                             | none                                    | high (0)                                 | high                          |
| 38 | Grande Briere                          | 3FR013           | slightly                                | increase (low)                              | none                                    | med (4)                                  | yes                           |
| 39 | Raba valley (Raba-völgy)               | 3HU025           | slightly                                | increase (high)                             | none                                    | high (0)                                 | high                          |
| 40 | Upper Drava River                      | 3AT023           | slightly                                | increase (high)                             | none                                    | high (0)                                 | high                          |
| 41 | Dnipro River Delta                     | 3UA009           | seriously                               | slightly                                    | none                                    | med (3)                                  | low                           |
| 42 | Lower Dniester (Nistru de Jos)         | 3MD002           | seriously                               | seriously                                   | none                                    | med (3)                                  | med                           |
| 43 | Dniester-Turunchuk Crossrivers Area    | 3UA006           | seriously                               | seriously                                   | none                                    | med (4)                                  | med                           |
| 44 | Gemenc                                 | 3HU015           | moderately                              | increase (high)                             | none                                    | high (0)                                 | high                          |
| 45 | Mures Floodplain                       | 3RO004           | slightly                                | seriously                                   | none                                    | high (0)                                 | yes                           |
| 46 | Nature Park Kopacki rit                | 3HR002           | significantly                           | increase (high)                             | med                                     | high (0)                                 | high                          |
| 47 | Lonjsko polje & Mokro polje            | 3HR003           | slightly                                | increase (low)                              | high                                    | high (0)                                 | high                          |
| 48 | Danube Delta                           | 3RO001           | moderately                              | increase (low)                              | high                                    | med (2)                                  | high                          |
| 49 | Obedska Bara                           | 3RS001           | moderately                              | increase (high)                             | high                                    | high (0)                                 | high                          |
| 50 | Canaralele de la Harsova               | 3RO016           | moderately                              | increase (low)                              | high                                    | high (1)                                 | high                          |
| 51 | Danube Islands-Bugeac-Iortmac          | 3RO017           | moderately                              | increase (low)                              | high                                    | high (1)                                 | high                          |
| 52 | Belene Islands Complex                 | 3BG006           | moderately                              | increase (low)                              | high                                    | high (0)                                 | high                          |
| 53 | Camargue                               | 3FR001           | moderately                              | increase (low)                              | none                                    | med (2)                                  | high                          |
| 54 | Neretva River Delta                    | 3HR004           | moderately                              | increase (high)                             | med                                     | high (0)                                 | high                          |
| 55 | Paul de Boquilobo                      | 3PT005           | seriously                               | slightly                                    | none                                    | med (5)                                  | med                           |
| 56 | Donana                                 | 3ES001           | seriously                               | significantly                               | none                                    | med (5)                                  | yes                           |
| 57 | Sebkhet Kelbia                         | 1TN016           | significantly                           | increase (low)                              | none                                    | low (7)                                  | no                            |
| 58 | Embouchure de la Moulouya              | 1MA015           | seriously                               | slightly                                    | none                                    | low (6)                                  | no                            |
| 59 | Delta Interieur du Niger               | 1ML001           | moderately                              | increase (low)                              | med                                     | med (4)                                  | med                           |

| ID | Wetland name                                             | Ramsar Reference | Flood volume reduction water management | Flood volume reduction climate change 2050s | Potential impact by new dam initiatives | Water availability for ecol. allocations | Formal institutional capacity |
|----|----------------------------------------------------------|------------------|-----------------------------------------|---------------------------------------------|-----------------------------------------|------------------------------------------|-------------------------------|
| 60 | Lake Chad Wetlands in Nigeria                            | 1NG002           | moderately                              | increase (low)                              | none                                    | low (11)                                 | med                           |
| 61 | Baturiya Wetland                                         | 1NG004           | seriously                               | increase (high)                             | none                                    | med (4)                                  | no                            |
| 62 | Zone humide du moyen Niger II                            | 1NE007           | slightly                                | increase (low)                              | med                                     | high (1)                                 | med                           |
| 63 | Plaines d'inondation des Bahr Aouk et Salamat            | 1TD005           | slightly                                | slightly                                    | none                                    | high (0)                                 | med                           |
| 64 | Lower Kaduna-Middle Niger Floodplain                     | 1NG007           | seriously                               | increase (high)                             | med                                     | high (0)                                 | med                           |
| 65 | Tana River Delta                                         | 1KE006           | moderately                              | increase (high)                             | none                                    | low (7)                                  | yes                           |
| 66 | Kilombero Valley Floodplain                              | 1TZ003           | slightly                                | increase (high)                             | med                                     | high (0)                                 | yes                           |
| 67 | Luangwa Flood Plains                                     | 1ZM005           | slightly                                | increase (low)                              | none                                    | high (0)                                 | no                            |
| 68 | Zambezi Floodplains                                      | 1ZM007           | slightly                                | slightly                                    | med                                     | high (0)                                 | med                           |
| 69 | Marromeu Complex (Zambezi Delta)                         | 1MZ001           | seriously                               | slightly                                    | med                                     | high (0)                                 | high                          |
| 70 | Okavango Delta System                                    | 1BW001           | slightly                                | increase (low)                              | med                                     | high (0)                                 | med                           |
| 71 | Ndumo Game Reserve                                       | 1ZA014           | slightly                                | increase (low)                              | none                                    | high (0)                                 | high                          |
| 72 | Lower Dvuobje                                            | 2RU013           | slightly                                | increase (low)                              | med                                     | high (0)                                 | low                           |
| 73 | Oka & Pra River Floodplains                              | 3RU007           | slightly                                | seriously                                   | none                                    | high (0)                                 | no                            |
| 74 | Volga Delta                                              | 3RU002           | seriously                               | seriously                                   | none                                    | high (0)                                 | no                            |
| 75 | Shandong Yellow River Delta Wetland                      | 2CN045           | seriously                               | increase (low)                              | high                                    | low (6)                                  | yes                           |
| 76 | Lower part of Pyandj River                               | 2TJ003           | slightly                                | increase (high)                             | none                                    | med (2)                                  | med                           |
| 77 | Hawizeh Marsh (Haur Al-Hawizeh)                          | 2IQ001           | seriously                               | moderately                                  | med                                     | low (7)                                  | med                           |
| 78 | Shadegan Marshes & mudflats of Khor-al Amaya & Khor Musa | 2IR006           | seriously                               | increase (high)                             | med                                     | low (6)                                  | no                            |
| 79 | Dong dongting hu                                         | 2CN004           | seriously                               | increase (high)                             | high                                    | high (0)                                 | yes                           |
| 80 | Sundarbans Reserved Forest                               | 2BD001           | moderately                              | increase (high)                             | high                                    | med (5)                                  | high                          |
| 81 | Middle Stretches of the Mekong River                     | 2KH003           | significantly                           | increase (high)                             | high                                    | high (0)                                 | med                           |
| 82 | Boeng Chhmar                                             | 2KH001           | slightly                                | increase (high)                             | none                                    | med (4)                                  | no                            |
| 83 | Bau Sau Wetlands and Seasonal Floodplains                | 2VN002           | slightly                                | increase (high)                             | med                                     | high (0)                                 | yes                           |
| 84 | Tram Chim National Park                                  | 2VN004           | moderately                              | increase (low)                              | high                                    | high (0)                                 | high                          |
| 85 | Lower Kinabatangan-Segama Wetland                        | 2MY006           | slightly                                | increase (high)                             | none                                    | high (0)                                 | no                            |
| 86 | Danau Sentarum                                           | 2ID002           | slightly                                | increase (low)                              | none                                    | high (0)                                 | no                            |
| 87 | Kakadu National Park                                     | 5AU002           | slightly                                | increase (high)                             | none                                    | high (0)                                 | yes                           |
| 88 | Ord River floodplain                                     | 5AU031           | seriously                               | increase (high)                             | none                                    | med (3)                                  | yes                           |
| 89 | Gwydir Wetlands                                          | 5AU051           | seriously                               | significantly                               | none                                    | low (7)                                  | yes                           |
| 90 | Macquarie Marshes                                        | 5AU027           | seriously                               | increase (high)                             | none                                    | low (8)                                  | yes                           |
| 91 | Riverland                                                | 5AU029           | seriously                               | increase (low)                              | none                                    | low (9)                                  | yes                           |
| 92 | Banrock Station Wetland Complex                          | 5AU059           | seriously                               | increase (low)                              | none                                    | low (10)                                 | yes                           |
| 93 | Barmah Forest                                            | 5AU014           | seriously                               | increase (high)                             | none                                    | med (5)                                  | yes                           |

## Supplementary material (S3)

In the paper, we present the impact of climate change on overbank flows for the 2050s represented as ensemble median. Table S3 provides the results for each single GCM projection and thus shows the uncertainty induced by the selection of different GCMs. All five GCMs, namely GFDL-ESM2M, HadGEM2-ES, IPSL-CM5A-LR, MIROC-ESM-CHEM, and NorESM1-M, were combined with a Representative Concentration Pathway leading to a radiative forcing of 6.0 W/m<sup>2</sup> (RCP6.0).

**Table S3.** Change in flood volume for selected riparian wetlands as a consequence of the solely effect of climate change in the 2050s presented for 5 different GCMs plus ensemble median.

| ID | Wetland name                        | Ramsar Reference | Flood vol. reduction<br>GFDL, 2050s | Flood vol. reduction<br>HadGEM, 2050s | Flood vol. reduction<br>IPSL, 2050s | Flood vol. reduction<br>MIROC, 2050s | Flood vol. reduction<br>NorESM, 2050s | Flood vol. reduction<br>Ens. median, 2050s |
|----|-------------------------------------|------------------|-------------------------------------|---------------------------------------|-------------------------------------|--------------------------------------|---------------------------------------|--------------------------------------------|
| 1  | Peace-Athabasca Delta               | 4CA007           | increase (low)                      | seriously                             | significantly                       | increase (high)                      | increase (high)                       | increase (low)                             |
| 2  | Lac Saint Pierre                    | 4CA036           | increase (high)                     | slightly                              | increase (high)                     | increase (low)                       | increase (low)                        | increase (low)                             |
| 3  | The Emiquon Complex                 | 4US033           | increase (low)                      | increase (high)                       | increase (low)                      | increase (low)                       | seriously                             | increase (low)                             |
| 4  | Cache-Lower White Rivers            | 4US008           | increase (low)                      | increase (low)                        | increase (low)                      | slightly                             | significantly                         | increase (low)                             |
| 5  | La Segua                            | 6EC005           | increase (high)                     | increase (high)                       | increase (high)                     | slightly                             | increase (high)                       | increase (high)                            |
| 6  | Mamiraua                            | 6BR003           | slightly                            | increase (high)                       | increase (low)                      | increase (low)                       | increase (high)                       | increase (low)                             |
| 7  | Ilha do Bananal                     | 6BR004           | significantly                       | slightly                              | increase (high)                     | seriously                            | slightly                              | slightly                                   |
| 8  | Rio Yata                            | 6BO011           | seriously                           | seriously                             | increase (high)                     | seriously                            | increase (high)                       | seriously                                  |
| 9  | Rio Blanco                          | 6BO009           | moderately                          | seriously                             | seriously                           | seriously                            | increase (high)                       | seriously                                  |
| 10 | Rio Matos                           | 6BO010           | slightly                            | increase (high)                       | increase (low)                      | slightly                             | slightly                              | slightly                                   |
| 11 | Pantanal Matogrossense              | 6BR001           | seriously                           | moderately                            | slightly                            | seriously                            | increase (low)                        | moderately                                 |
| 12 | Humedales Chaco                     | 6AR013           | significantly                       | increase (high)                       | increase (high)                     | significantly                        | slightly                              | slightly                                   |
| 13 | Jaaukanigas                         | 6AR009           | significantly                       | increase (high)                       | increase (high)                     | significantly                        | slightly                              | slightly                                   |
| 14 | River Luiro Mires                   | 3FI039           | increase (high)                     | seriously                             | seriously                           | increase (high)                      | slightly                              | slightly                                   |
| 15 | Matsalu Nature Reserve              | 3EE001           | seriously                           | slightly                              | increase (high)                     | moderately                           | seriously                             | moderately                                 |
| 16 | River Spey - Insh Marshes           | 3UK106           | increase (high)                     | increase (high)                       | seriously                           | increase (high)                      | seriously                             | increase (high)                            |
| 17 | Firth of Tay and Eden Estuary       | 3UK144           | slightly                            | increase (high)                       | seriously                           | increase (high)                      | increase (high)                       | increase (high)                            |
| 18 | Helgean                             | 3SE003           | increase (high)                     | increase (high)                       | increase (high)                     | moderately                           | seriously                             | increase (high)                            |
| 19 | Lower Derwent Valley                | 3UK023           | moderately                          | significantly                         | increase (low)                      | moderately                           | moderately                            | moderately                                 |
| 20 | Elbauen, Schnackenburg-Lauenburg    | 3DE005           | moderately                          | slightly                              | increase (low)                      | seriously                            | moderately                            | moderately                                 |
| 21 | Unteres Odertal, Schwedt            | 3DE022           | slightly                            | seriously                             | increase (high)                     | seriously                            | increase (low)                        | slightly                                   |
| 22 | Niederung der unteren Havel         | 3DE021           | increase (high)                     | moderately                            | increase (low)                      | increase (high)                      | slightly                              | increase (low)                             |
| 23 | Nene Washes                         | 3UK059           | moderately                          | moderately                            | moderately                          | moderately                           | moderately                            | moderately                                 |
| 24 | Desna River Floodplains             | 3UA028           | moderately                          | seriously                             | significantly                       | seriously                            | slightly                              | significantly                              |
| 25 | Mid-Prpyat State Landscape Zakaznik | 3BY002           | slightly                            | seriously                             | increase (low)                      | seriously                            | slightly                              | slightly                                   |

|    |                                               |        |                 |                 |                 |                 |                 |                 |
|----|-----------------------------------------------|--------|-----------------|-----------------|-----------------|-----------------|-----------------|-----------------|
| 26 | Prypiat River Floodplains                     | 3UA021 | slightly        | seriously       | increase (low)  | seriously       | significantly   | significantly   |
| 27 | Unterer Niederrhein                           | 3DE028 | seriously       | increase (high) | seriously       | increase (low)  | increase (low)  | increase (low)  |
| 28 | Stokhid River Floodplains                     | 3UA022 | slightly        | seriously       | increase (high) | seriously       | moderately      | moderately      |
| 29 | Rheinauen zwischen Eltville und Bingen        | 3DE009 | seriously       | increase (high) | seriously       | increase (high) | seriously       | seriously       |
| 30 | Litovelske Pomoravi                           | 3CZ008 | increase (low)  | increase (low)  | slightly        | seriously       | slightly        | slightly        |
| 31 | Donauauen & Donaumoos                         | 3DE011 | increase (high) | increase (high) | moderately      | seriously       | seriously       | moderately      |
| 32 | Felső-Tisza (Upper Tisza)                     | 3HU023 | seriously       | seriously       | moderately      | seriously       | seriously       | seriously       |
| 33 | Moravske luhy (Morava floodplains)            | 3SK005 | moderately      | moderately      | increase (high) | seriously       | moderately      | moderately      |
| 34 | Tisa River                                    | 3SK014 | seriously       | seriously       | moderately      | seriously       | seriously       | seriously       |
| 35 | Donau-March-Thaya-Auen                        | 3AT002 | increase (high) | increase (high) | increase (high) | increase (low)  | seriously       | increase (high) |
| 36 | Ipoly Valley                                  | 3HU021 | seriously       | seriously       | increase (high) | seriously       | seriously       | seriously       |
| 37 | Dunajske luhy (Danube floodplains)            | 3SK006 | increase (high) | increase (high) | increase (high) | increase (low)  | seriously       | increase (high) |
| 38 | Grande Briere                                 | 3FR013 | significantly   | increase (low)  | increase (high) | significantly   | increase (high) | increase (low)  |
| 39 | Raba valley (Raba-völgy)                      | 3HU025 | increase (low)  | increase (high) | increase (high) | increase (high) | seriously       | increase (high) |
| 40 | Upper Drava River                             | 3AT023 | increase (high) | increase (low)  | increase (high) | increase (high) | seriously       | increase (high) |
| 41 | Dnipro River Delta                            | 3UA009 | slightly        | seriously       | slightly        | significantly   | increase (high) | slightly        |
| 42 | Lower Dniester (Nistru de Jos)                | 3MD002 | moderately      | seriously       | increase (high) | seriously       | seriously       | seriously       |
| 43 | Dniester-Turunchuk Crossrivers Area           | 3UA006 | moderately      | seriously       | increase (high) | seriously       | seriously       | seriously       |
| 44 | Gemenc                                        | 3HU015 | increase (high) | increase (high) | increase (high) | increase (low)  | moderately      | increase (high) |
| 45 | Mures Floodplain                              | 3RO004 | slightly        | seriously       | seriously       | seriously       | moderately      | seriously       |
| 46 | Nature Park Kopacki Rit                       | 3HR002 | increase (high) | increase (high) | increase (high) | increase (high) | significantly   | increase (high) |
| 47 | Lonjsko Polje & Mokro Polje                   | 3HR003 | significantly   | increase (low)  | increase (high) | increase (high) | seriously       | increase (low)  |
| 48 | Danube Delta                                  | 3RO001 | significantly   | increase (low)  | increase (low)  | slightly        | increase (low)  | increase (low)  |
| 49 | Obedska Bara                                  | 3RS001 | slightly        | increase (low)  | increase (high) | increase (high) | increase (high) | increase (high) |
| 50 | Canaralele de la Harsova                      | 3RO016 | significantly   | increase (low)  |
| 51 | Danube Islands-Bugeac-Iortmac                 | 3RO017 | significantly   | increase (low)  |
| 52 | Belene Islands Complex                        | 3BG006 | moderately      | increase (low)  |
| 53 | Camargue                                      | 3FR001 | increase (low)  | increase (low)  | increase (high) | increase (high) | seriously       | increase (low)  |
| 54 | Neretva River Delta                           | 3HR004 | seriously       | increase (high) | increase (high) | increase (high) | slightly        | increase (high) |
| 55 | Paul do Boquilobo                             | 3PT005 | moderately      | increase (low)  | increase (high) | slightly        | slightly        | slightly        |
| 56 | Donana                                        | 3ES001 | slightly        | seriously       | increase (high) | seriously       | significantly   | significantly   |
| 57 | Sebkhet Kelbia                                | 1TN016 | seriously       | increase (high) | seriously       | increase (high) | increase (low)  | increase (low)  |
| 58 | Embouchure de la Moulouya                     | 1MA015 | increase (high) | seriously       | moderately      | slightly        | increase (low)  | slightly        |
| 59 | Delta Interieur du Niger                      | 1ML001 | increase (high) | moderately      | increase (low)  | increase (high) | increase (low)  | increase (low)  |
| 60 | Lake Chad Wetlands in Nigeria                 | 1NG002 | moderately      | increase (low)  | increase (high) | increase (high) | increase (low)  | increase (low)  |
| 61 | Baturiya Wetland                              | 1NG004 | significantly   | increase (high) | increase (high) | increase (high) | seriously       | increase (high) |
| 62 | Zone humide du moyen Niger II                 | 1NE007 | increase (low)  | slightly        | increase (low)  | increase (high) | increase (low)  | increase (low)  |
| 63 | Plaines d'inondation des Bahr Aouk et Salamat | 1TD005 | seriously       | slightly        | increase (high) | increase (high) | slightly        | slightly        |
| 64 | Lower Kaduna-Middle Niger Floodplain          | 1NG007 | increase (high) | moderately      | increase (high) | increase (high) | increase (low)  | increase (high) |
| 65 | Tana River Delta                              | 1KE006 | increase (low)  | increase (high) | increase (high) | increase (high) | increase (low)  | increase (high) |
| 66 | Kilombero Valley Floodplain                   | 1TZ003 | slightly        | increase (high) |



|    |                                                          |        |                 |                 |                 |                 |                 |                 |
|----|----------------------------------------------------------|--------|-----------------|-----------------|-----------------|-----------------|-----------------|-----------------|
| 67 | Luangwa Flood Plains                                     | 1ZM005 | seriously       | increase (low)  | increase (high) | significantly   | increase (low)  | increase (low)  |
| 68 | Zambezi Floodplains                                      | 1ZM007 | slightly        | increase (high) | moderately      | increase (low)  | seriously       | slightly        |
| 69 | Marrromeu Complex (Zambezi Delta)                        | 1MZ001 | slightly        | increase (high) | increase (high) | seriously       | moderately      | slightly        |
| 70 | Okavango Delta System                                    | 1BW001 | increase (low)  | increase (low)  | increase (high) | moderately      | seriously       | increase (low)  |
| 71 | Ndumo Game Reserve                                       | 1ZA014 | increase (high) | increase (high) | increase (low)  | seriously       | increase (low)  | increase (low)  |
| 72 | Lower Dvuoobje                                           | 2RU013 | increase (high) | slightly        | increase (low)  | increase (high) | increase (low)  | increase (low)  |
| 73 | Oka & Pra River Floodplains                              | 3RU007 | significantly   | seriously       | seriously       | seriously       | significantly   | seriously       |
| 74 | Volga Delta                                              | 3RU002 | significantly   | seriously       | seriously       | seriously       | significantly   | seriously       |
| 75 | Shandong Yellow River Delta Wetland                      | 2CN045 | increase (high) | seriously       | increase (low)  | significantly   | increase (low)  | increase (low)  |
| 76 | Lower part of Pyandj River                               | 2TJ003 | increase (high) | increase (high) | slightly        | increase (low)  | increase (high) | increase (high) |
| 77 | Hawizeh Marsh (Haur Al-Hawizeh)                          | 2IQ001 | seriously       | increase (low)  | moderately      | seriously       | increase (high) | moderately      |
| 78 | Shadegan Marshes & mudflats of Khor-al Amaya & Khor Musa | 2IR006 | increase (high) | increase (high) | seriously       | slightly        | increase (high) | increase (high) |
| 79 | Dong dongting hu                                         | 2CN004 | increase (high) | increase (low)  | increase (low)  | increase (high) | increase (high) | increase (high) |
| 80 | Sundarbans Reserved Forest                               | 2BD001 | increase (high) | increase (high) | increase (high) | increase (high) | slightly        | increase (high) |
| 81 | Middle Stretches of the Mekong River                     | 2KH003 | increase (high) | increase (high) | increase (high) | increase (low)  | increase (low)  | increase (high) |
| 82 | Boeng Chhmar                                             | 2KH001 | increase (high) | increase (low)  | increase (high) | slightly        | increase (high) | increase (high) |
| 83 | Bau Sau Wetlands and Seasonal Floodplains                | 2VN002 | increase (high) | seriously       | increase (high) | increase (high) | increase (low)  | increase (high) |
| 84 | Tram Chim National Park                                  | 2VN004 | increase (high) | increase (low)  | increase (low)  | increase (high) | increase (low)  | increase (low)  |
| 85 | Lower Kinabatangan-Segama Wetland                        | 2MY006 | increase (high) | increase (high) | increase (high) | slightly        | seriously       | increase (high) |
| 86 | Danau Sentarum                                           | 2ID002 | increase (high) | increase (low)  | increase (high) | slightly        | increase (low)  | increase (low)  |
| 87 | Kakadu National Park                                     | 5AU002 | moderately      | increase (high) | seriously       | increase (high) | increase (high) | increase (high) |
| 88 | Ord River floodplain                                     | 5AU031 | increase (high) | increase (high) | increase (low)  | increase (high) | increase (high) | increase (high) |
| 89 | Gwydir Wetlands                                          | 5AU051 | significantly   | increase (low)  | slightly        | significantly   | significantly   | significantly   |
| 90 | Macquarie Marshes                                        | 5AU027 | seriously       | increase (high) | increase (high) | increase (high) | seriously       | increase (high) |
| 91 | Riverland                                                | 5AU029 | seriously       | moderately      | increase (low)  | increase (high) | increase (high) | increase (low)  |
| 92 | Banrock Station Wetland Complex                          | 5AU059 | seriously       | moderately      | increase (low)  | increase (high) | increase (high) | increase (low)  |
| 93 | Barmah Forest                                            | 5AU014 | seriously       | increase (high) | increase (low)  | increase (high) | increase (high) | increase (high) |
